# Supplementary material for: Perspectives of paediatric occupational therapists on the use of evidence-based practice in Kuwait: a qualitative study
Source: PubMed Central journal article supplement — BMJ Open. 2024 Dec 12;14(12):e086617. doi: 10.1136/bmjopen-2024-086617 (PMC11647311; doi:10.1136/bmjopen-2024-086617), 2024-12-12
Supplement: bmjopen-14-12-s001.pdf [file bmjopen-14-12-s001.pdf]

### **Interview guide**

1. What is EBP? And what does it mean to you?
2. How often do you use EBP? What does using EBP means to you?
3. What does it require from you to use EBP?
4. What are the factors that help you to implement EBP?
5. How do you implement EBP in your work?
6. What encourages you to implement EBP?
7. Do you use any strategy to help you be updated with EBP?
8. What are the barriers you are facing to implement EBP?
9. How are these barriers are limiting you from using EBP?
10. What are the strategies that you use to reduce these barriers?
11. Can you give a scenario from your experience oh how you used EBP?
